# Supplementary material for: Activation of the IGF1R pathway potentially mediates acquired resistance to mutant-selective 3rd-generation EGF receptor tyrosine kinase inhibitors in advanced non-small cell lung cancer
Source: PubMed Central journal article supplement (PMC5008340; doi:10.18632/oncotarget.8013), 2016-03-09
Supplement: oncotarget-07-22005-s001.pdf [file oncotarget-07-22005-s001.pdf]

## Activation of the IGF1R pathway potentially mediates acquired resistance to mutant-selective 3rd-generation EGF receptor tyrosine kinase inhibitors in advanced non-small cell lung cancer

### Supplementary Materials

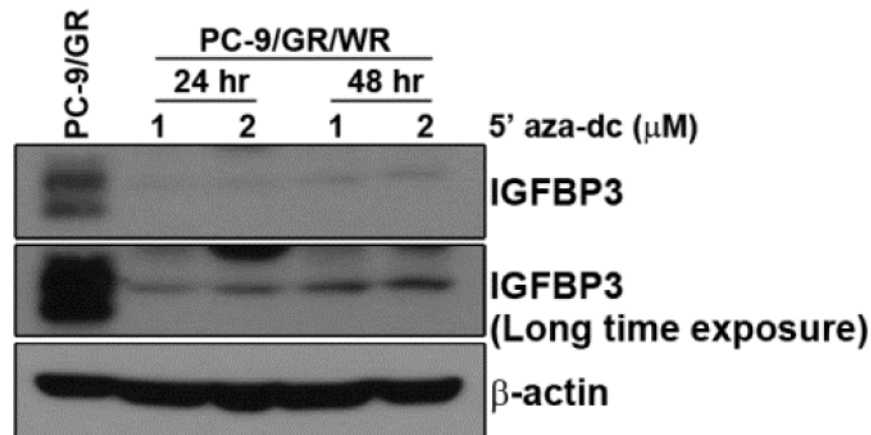

**Supplementary Figure S1: Effect of 5-aza-dC treatment on IGF1R expression.** Cells were treated with the indicated time or dose of 5-aza-dC. IGF1R expression was determined by Western blotting.

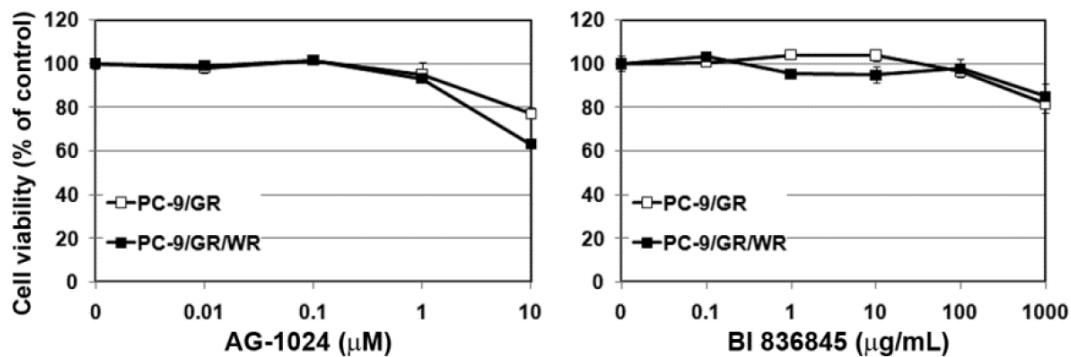

**Supplementary Figure S2: Cytotoxicity of AG-1024 or BI 836845.** Cells were treated with the indicated dose of AG-1024 or BI 836845 for 72 h. Cellular viability was determined by MTT assay.

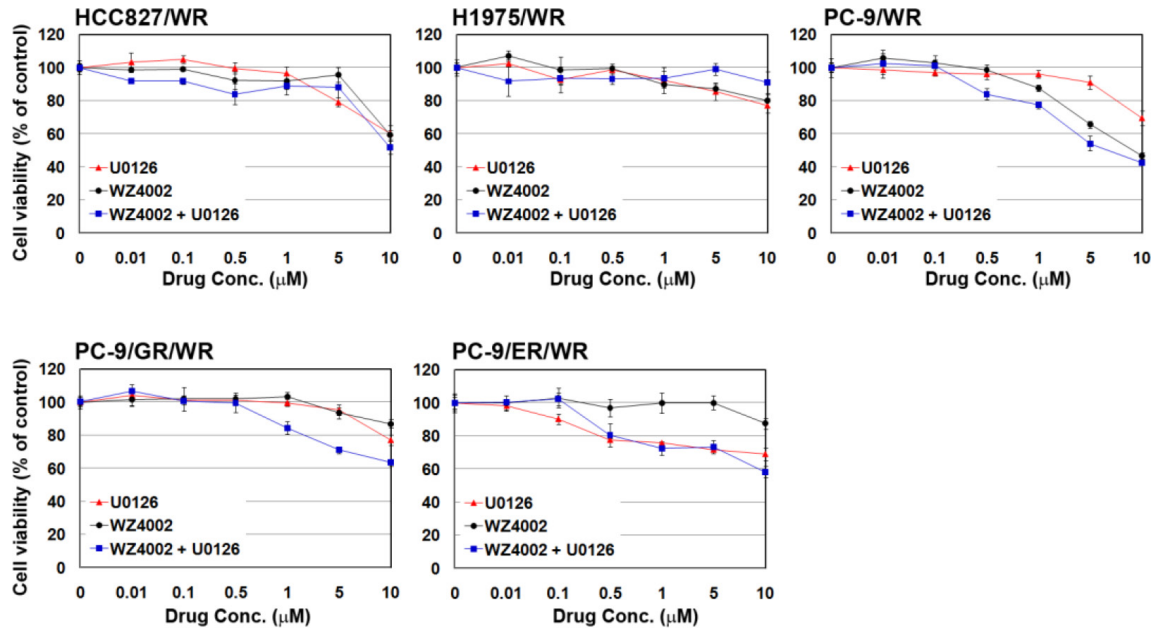

**Supplementary Figure S3: Effect of combination WZ4002 and U0126 in cells with acquired resistance to WZ4002.** WZ4002-resistant cells were treated with WZ4002, U0126, or a combination of two drugs for 72 h. Cellular viability was determined by MTT assay.
